# PconsC4: fast, free, easy, and accurate contact predictions.

Mirco Michel<sup>1,\*</sup>, David Menéndez Hurtado<sup>1,\*</sup>, and Arne Elofsson<sup>1,†</sup>

<sup>1</sup>Science for Life Laboratory and Department of Biochemistry and Biophysics, Stockholm University, Stockholm 10691, Sweden.

<sup>†</sup>To whom correspondence should be addressed

\*Contributed equally.

August 2, 2018

## Abstract

**Motivation:** Residue contact prediction was revolutionized recently by the introduction of direct coupling analysis (DCA). Further improvements, in particular for small families, have been obtained by the combination of DCA and deep learning methods. However, existing deep learning contact prediction methods often rely on a number of external programs and are therefore computationally expensive.

**Results:** Here, we introduce a novel contact predictor, PconsC4, which performs on par with state of the art methods. PconsC4 is heavily optimized, does not use any external programs and therefore is significantly faster and easier to use than other methods.

**Availability:** PconsC4 is freely available under the GPL license from <https://github.com/ElofssonLab/PconsC4>. Installation is easy using the pip command and works on any system with Python 3.5 or later and a modern GCC compiler.

**Contact:** arne@bioinfo.se

## Introduction

To predict the structure of a protein from no other information than its sequence has been a major challenge in bioinformatics for decades. With the introduction of direct coupling analysis (DCA) to improve contact predictions (Weigt *et al.*, 2009) significant progress in protein structure prediction was reported in 2011 (Morcos *et al.*, 2011; Marks *et al.*, 2011). These methods have then been used to predict the structure of hundreds of protein families with high accuracy to an unprecedented accuracy (Ovchinnikov *et al.*, 2017). One disadvantage of DCA methods is that they require very large multiple sequence alignments to provide accurate contact predictions. This problem has been overcome by refining the initial DCA prediction with deep learning methods (Skwark *et al.*, 2014; Wang *et al.*, 2017).

Although the structure can accurately be predicted for many protein families, there still exist many families where the predictions are not sufficiently accurate. Although predictions are better for larger families, many other factors also seem to be important (Michel *et al.*, 2017a). The exact reason for what is needed to improve the predictions is not well understood. But it is not unlikely that the underlying multiple sequence alignments are not optimal. It might therefore be possible to improve the predictions if alternative multiple sequence alignments are examined or metagenomics data is included. Given the computational costs of earlier deep learning contact prediction methods it has been difficult to exhaustively examine alternative alignments for each protein family.

Here, we present a novel deep learning approach, PconsC4, that performs as well, or even better, than earlier methods. More importantly it is freely available, significantly faster and easier to install than alternative methods. This provides all users with an easy way to explore alternative multiple sequence alignments or other parameters for contact predictions.

## Implementation

Below follows a short description of PconsC4, for details see the supporting information. PconsC4 is trained on a set of 2791 proteins culled from PDB and benchmarked on two datasets without any

homology to the training set. One validation set is identical to the benchmark set in PconsC3 (Michel *et al.*, 2017b). Additionally, we benchmarked PconsC4 on 44 proteins from CASP12, see Tables S2-S5. Multiple sequence alignments are created using three iterations of HHblits (Remmert *et al.*, 2011) and an e-value threshold of 1.0. Other alignment methods and cut-offs as well as combinations of different alignments were tested but did not provide significant improvements.

From each position in the multiple sequence alignments 72 features are calculated and fed into the PconsC4 network. These include: 68 one-dimensional sequential features and four pairwise features; the GaussDCA score (Baldassi *et al.*, 2014), APC-corrected mutual information, normalized APC-corrected mutual information, and cross-entropy.

At the core of PconsC4 is the U-net architecture (Ronneberger *et al.*, 2015), designed for image segmentation. It is composed of a series of convolutional layers, down- and up-sampling, with shortcut connections to help convergence.

To include secondary structure information but remain independent of external predictors, we took the pre-trained network from ProQ4 (Menéndez Hurtado *et al.*, 2018), that takes all the one-dimensional inputs and predicts secondary structure, dihedral angles, and surface accessibility for each residue. PconsC4 takes the output of the second to last layer, transforms them into two-dimensional features via an outer product, and concatenates them to the rest of the inputs.

Finally, the network produces four outputs: the probability of a contact for the thresholds of 6, 8, or 10 Å, and the distance measured as S-score.

To reduce the number of dependencies and overall run time, we re-implemented GaussDCA as a Python package using Pythran (Guelton *et al.*, 2015) resulting in a speedup of a factor of three. Optimization details are in section 2 of the supplementary information.

Table 1: Performance in PPV for the  $L$  top-ranked contact with a sequence separation of  $> 5$  residues. Results for all, small families with Meff (Baldassi *et al.*, 2014)  $<$  and for short-, (5, 12), medium- (12, 23) and long: (23,  $\infty$ ) ranges. Average runtime and external dependencies.

|            | All  | Small | Short | Med  | Long | Time [s] | Deps.       |
|------------|------|-------|-------|------|------|----------|-------------|
| PlmDCA     | 0.36 | 0.12  | 0.14  | 0.15 | 0.26 | 84       | -           |
| GaussDCA   | 0.34 | 0.12  | 0.14  | 0.15 | 0.25 | 27       | -           |
| PSICOV     | 0.34 | 0.11  | 0.13  | 0.14 | 0.22 | 114      | -           |
| PhyCMAP    | 0.32 | 0.29  | 0.24  | 0.19 | 0.18 | 718      | 1,3         |
| PconsC3    | 0.57 | 0.36  | 0.25  | 0.25 | 0.37 | 2931     | 1,2,3,4,5,6 |
| Metapsicov | 0.59 | 0.39  | 0.27  | 0.26 | 0.36 | 1158     | 1,3,7,8,9   |
| PconsC4    | 0.65 | 0.42  | 0.29  | 0.28 | 0.45 | 12 (56*) | -           |

1: PSIPRED, 2: NetSurfP, 3: PSI-BLAST, 4: PhyCMAP, 5: PlmDCA, 6: GaussDCA, 7: PSICOV, 8: Freecontact, 9: CCMpred.

\* Timing without pre-loading the network.

## Results and Discussion

Table 1 shows a performance comparison of different methods running on the same alignments. PconsC4 performs 14% better than PconsC3 on the benchmark dataset and 10% better than Metapsicov. These improvements are consistent across short, medium, and long range contacts and for all thresholds (Figures S1-2). Additional evaluations are also presented in the supplementary information. As shown in Figures S3-4, the predicted scores are well calibrated, i.e. the reported scores reflect the real probability for a contact to exist. This enables easy comparison of alternative alignments.

All machine learning methods perform significantly better than the DCA methods for smaller families. PconsC4 approaches maximum performance at around  $10^2$  effective sequences compared with  $10^5$  for the DCA methods (Figure S5).

The overall performance is comparable to meta-meta predictors such as DNCON2 (Adhikari *et al.*, 2018) or other deep learning methods (Wang *et al.*, 2017). However, a direct comparison is difficult as these programs are either not available for download, too slow to run for large scale experiments, or cannot be used with a specific multiple sequence alignment.

The main advantage of PconsC4 is that it is fast and easy to use. Starting from a single input alignment PconsC4 predicts the contacts in less than one minute (or 12 s if the network is preloaded).

This is more than 25 times faster than PconsC3 or Metapsicov, while still consistently outperforming them. Since PconsC4 is not tied to any specific alignment method, it can directly take advantage of any improvement on this front, such as the use of alternative alignment strategies (Buchan and Jones, 2017) or metagenomics data (Ovchinnikov *et al.*, 2017), and thus be easily integrated into pipelines.

## Acknowledgements

Our thanks to Serge Guelton for his swift fixes to Pythran and to Nikos Tsardakas Renhuldt for discussion. This work was supported by grants from the Swedish Research Council (VR-NT 2016-03798 to AE). This research was conducted using the resources of High Performance Computing Center North (HPC2N).

## References

- Adhikari, B., Hou, J., and Cheng, J. (2018). DNCON2: improved protein contact prediction using two-level deep convolutional neural networks. *Bioinformatics*, **34**(9), 1466–1472.
- Baldassi, C., Zamparo, M., Feinauer, C., Procaccini, A., Zecchina, R., Weigt, M., and Pagnani, A. (2014). Fast and accurate multivariate gaussian modeling of protein families: Predicting residue contacts and protein-interaction partners. *PLOS ONE*, **9**(3), 1–12.
- Buchan, D. W. A. and Jones, D. T. (2017). Improved protein contact predictions with the metapsicov2 server in casp12. *Proteins: Structure, Function, and Bioinformatics*, **86**(S1), 78–83.
- Guelton, S., Brunet, P., Amini, M., Merlini, A., Corbillon, X., and Raynaud, A. (2015). Pythran: Enabling static optimization of scientific python programs. *Computational Science & Discovery*, **8**(1), 014001.
- Marks, D., Colwell, L., Sheridan, R., Hopf, T., Pagnani, A., Zecchina, R., and Sander, C. (2011). Protein 3d structure computed from evolutionary sequence variation. *PLoS One*, **6**(12), e28766.
- Menéndez Hurtado, D., Uziela, K., and Elofsson, A. (2018). Deep transfer learning in the assessment of the quality of protein models. *ArXiv e-prints*.
- Michel, M., Menendez Hurtado, D., Uziela, K., and Elofsson, A. (2017a). Large-scale structure prediction by improved contact predictions and model quality assessment. *Bioinformatics*, **33**(14), i23–i29.
- Michel, M., Skwark, M. J., Menendez Hurtado, D., Ekeberg, M., and Elofsson, A. (2017b). Predicting accurate contacts in thousands of pfam domain families using pcons3. *Bioinformatics*, **33**(18), 2859–2866.
- Morcos, F., Pagnani, A., Lunt, B., Bertolino, A., Marks, D., Sander, C., Zecchina, R., Onuchic, J., Hwa, T., and Weigt, M. (2011). Direct-coupling analysis of residue coevolution captures native contacts across many protein families. *Proc Natl Acad Sci U S A*, **108**(49), 1293–301.
- Ovchinnikov, S., Park, H., Varghese, N., Huang, P., Pavlopoulos, G., Kim, D., Kamisetty, H., Kyrpides, N., and Baker, D. (2017). Protein structure determination using metagenome sequence data. *Science*, **355**(6322), 294–298.
- Remmert, M., Biegert, A., Hauser, A., and Söding, J. (2011). HHblits: lightning-fast iterative protein sequence searching by HMM-HMM alignment. *Nature Methods*, **9**(2), 173–175.
- Ronneberger, O., Fischer, P., and Brox, T. (2015). U-net: Convolutional networks for biomedical image segmentation. In N. Navab, J. Hornegger, W. M. Wells, and A. F. Frangi, editors, *Medical Image Computing and Computer-Assisted Intervention – MICCAI 2015*, pages 234–241, Cham. Springer International Publishing.
- Skwark, M., Raimondi, D., Michel, M., and Elofsson, A. (2014). Improved contact predictions using the recognition of protein like contact patterns. *PLoS Comput Biol*, **10**(11), e1003889.
- Wang, S., Sun, S., Li, Z., Zhang, R., and Xu, J. (2017). Accurate de novo prediction of protein contact map by ultra-deep learning model. *PLoS Comput Biol*, **13**(1), e1005324.

Weigt, M., White, R., Szurmant, H., Hoch, J., and Hwa, T. (2009). Identification of direct residue contacts in protein-protein interaction by message passing. *Proc Natl Acad Sci U S A*, **106**(1), 67–72.

# Supplementary materials to "PconsC4: fast, free, easy, and accurate contact predictions."

Mirco Michel, David Menéndez-Hurtado and Arne Elofsson

August 2, 2018

## Contents

|                                                                                            |           |
|--------------------------------------------------------------------------------------------|-----------|
| <b>1 Results</b>                                                                           | <b>1</b>  |
| 1.1 ROC and calibration curves . . . . .                                                   | 3         |
| 1.2 Precision as a function of the alignment depth . . . . .                               | 6         |
| <b>2 GaussDCA optimization</b>                                                             | <b>6</b>  |
| 2.1 GaussDCA and compressed alignments . . . . .                                           | 6         |
| 2.2 Fast estimation of the expected similarity threshold, $\theta$ , in GaussDCA . . . . . | 7         |
| <b>3 Training</b>                                                                          | <b>7</b>  |
| 3.1 Description of inputs . . . . .                                                        | 7         |
| 3.1.1 One-dimensional inputs . . . . .                                                     | 7         |
| 3.1.2 Two-dimensional inputs . . . . .                                                     | 8         |
| 3.2 Training and testing sets . . . . .                                                    | 8         |
| <b>4 Pipeline</b>                                                                          | <b>8</b>  |
| <b>5 Instructions</b>                                                                      | <b>11</b> |
| 5.1 Installation . . . . .                                                                 | 11        |
| 5.2 Example usage . . . . .                                                                | 11        |
| 5.3 Supported formats . . . . .                                                            | 11        |
| <b>6 Training and test sets</b>                                                            | <b>12</b> |

## 1 Results

Here we report more detailed comparisons on the test sets. First, in Table S1 we compare short, medium, and long range contacts, showing that PconsC4 is better than previous methods at all ranges. Figures S1 and S2 show the receiver operating characteristic curves.

We also include an expanded version of the Table 1, Table S1 including CASP12 and other methods. For benchmarking GaussDCA we used the Julia implementation and CCMpred for PlmDCA. The times were measured on a machine with an Intel i7-4770 CPU and a NVIDIA 1070Ti GPU for CCMpred.

PconsC4 seems to be better calibrated than earlier methods, as shown in Figures S3 and S4. This means that a predicted score of 0.2 indicates that there is a 20% chance for a contact to exist. A perfectly calibrated predictor would lie on the diagonal (dotted line).

Table S1: Precision for the top  $L$  contacts, where  $L$  is the sequence length, at different distance thresholds. Short: (5, 12], medium: (12, 23], long: (23,  $\infty$ ).

| Method     | Benchmark set |        |      |
|------------|---------------|--------|------|
|            | Short         | Medium | Long |
| PlmDCA     | 0.14          | 0.15   | 0.26 |
| GaussDCA   | 0.14          | 0.15   | 0.25 |
| PSICOV     | 0.13          | 0.14   | 0.22 |
| PhyCMAP    | 0.24          | 0.19   | 0.18 |
| PconsC3    | 0.25          | 0.25   | 0.37 |
| MetaPSICOV | 0.27          | 0.26   | 0.36 |
| PconsC4    | 0.29          | 0.28   | 0.45 |

Table S2: Performance in PPV for the  $L$  top-ranked contact with a sequence separation of  $> 5$  residues, average runtime in seconds on the benchmark set, and external dependencies (except for alignment methods).

|                       | Benchmark set | CASP12 | Time [s] | Deps.       |
|-----------------------|---------------|--------|----------|-------------|
| PlmDCA (CCMpred, GPU) | 0.36          | 0.26   | 84       | -           |
| PlmDCA (CCMpred, CPU) | 0.36          | 0.26   | 393      | -           |
| GaussDCA (Julia)      | 0.34          | 0.25   | 27       | -           |
| GaussDCA (Pythran)    | 0.34          | 0.25   | 10       | -           |
| PSICOV                | 0.34          | 0.20   | 114      | -           |
| PhyCMAP               | 0.32          | 0.22   | 718      | 1,3         |
| PconsC3               | 0.57          | 0.39   | 2931     | 1,2,3,4,5,6 |
| Metapsicov            | 0.59          | 0.43   | 1158     | 1,3,7,8,9   |
| PconsC4               | 0.65          | 0.46   | 56       | -           |
| PconsC4 (pre-loaded)  | 0.65          | 0.46   | 12       | -           |

1: PSIPRED, 2: NetSurfP, 3: PSI-BLAST, 4: PhyCMAP, 5: PlmDCA, 6: GaussDCA, 7: PSICOV, 8: Freecontact, 9: CCMpred.

## 1.1 ROC and calibration curves

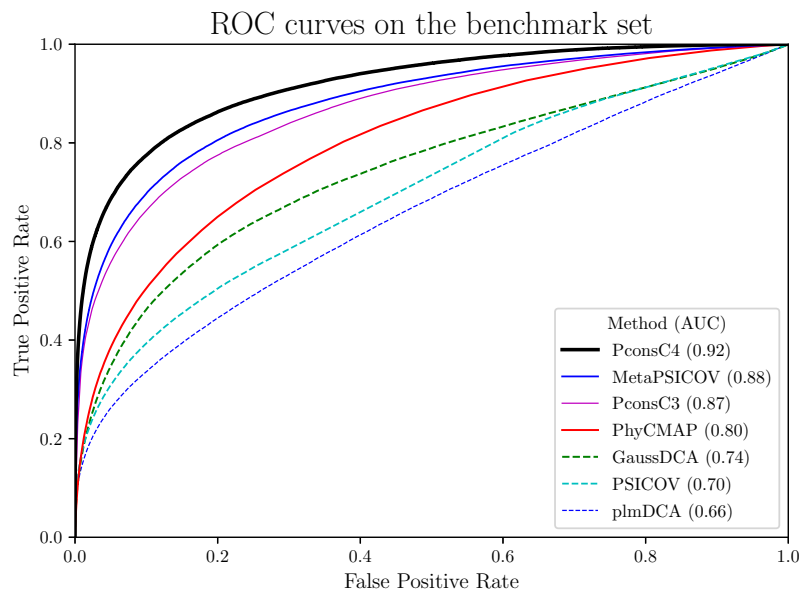

Figure S1: ROC curves on the Benchmark set

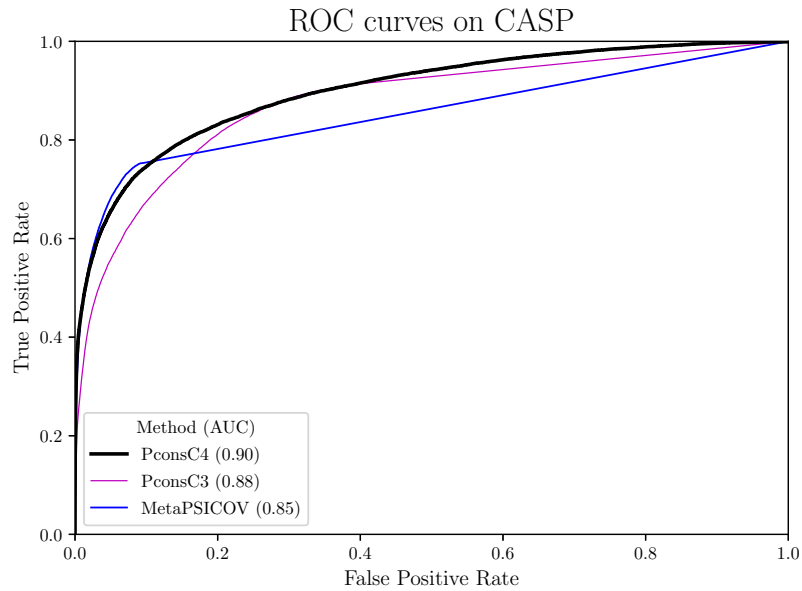

Figure S2: ROC curves on CASP12

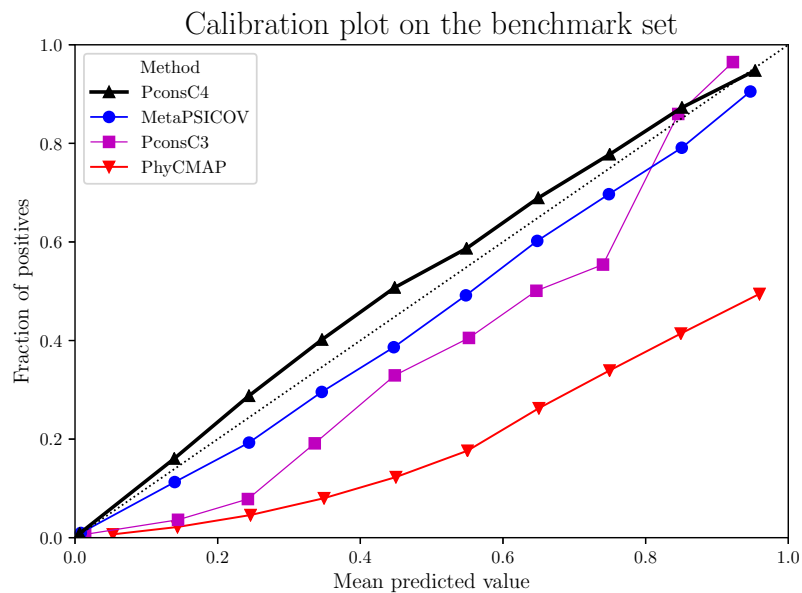

Figure S3: Calibration curves on the Benchmark set



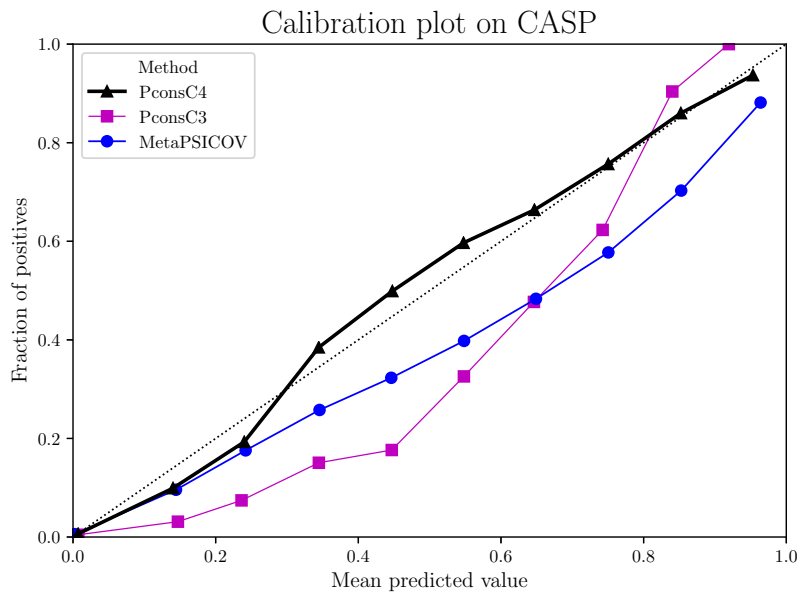

Figure S4: Calibration curves on CASP12

## 1.2 Precision as a function of the alignment depth

The Figure S5 shows performance vs. number of effective sequences. Here we use the same definition as in (Baldassi *et al.*, 2014a): the number of sequences that are significantly different from each other. While statistical methods, like DCA, benefit from a constant improvement for larger number of effective sequences, PconsC4 starts to plateau at around  $10^2$  sequences. This suggests that it is capable of learning to ignore the noise in DCA methods, even when the signal is weak.

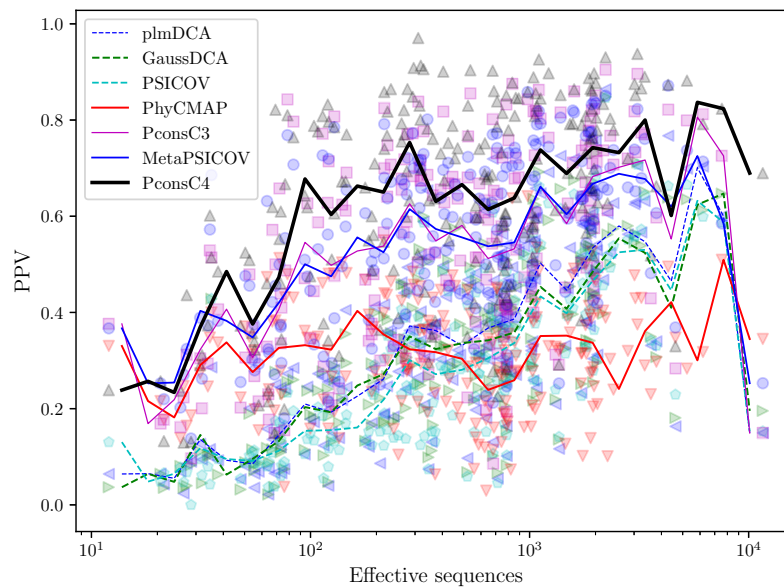

Figure S5: PPV vs. number of effective sequences on the benchmark set. The top  $L$  contacts are considered.

## 2 GaussDCA optimization

In the reimplementation of GaussDCA we made two differences with respect to the reference implementation that improve the speed, while keeping the results exactly the same.

### 2.1 GaussDCA and compressed alignments

Much of the CPU time is spent computing sequence weights, which means we need to compute all pairwise Hamming distances between sequences in the multiple sequence alignment. In a naive implementation, we store the alignment as a 2D array of int8. The compiler can then use SIMD instructions to combine several numbers to fit them in the word size of the CPU.

The Julia implementation of Gaussdca, (Baldassi *et al.*, 2014b), uses a manually compressed alignment: since we have only 21 states, we only need 5 bits

per symbol, so we can manually pack up to 12 amino acids in a single 64 bits int, that fits our CPU optimally. To compute the distance, we need to XOR the sequences, and count the number of 5-bit regions where it differs. This gives us a 50% increase in packing efficiency with respect to the naive 8-bit storage.

In our re-implementation we found that the naive version is actually faster, probably because it is easier for the compiler (GCC 7) to optimize. Further improvements can be obtained activating auto-vectorization (GCC flag `-ftree-vectorize`), suggesting that the code emitted by Pythran is more suitable for vectorization.

## 2.2 Fast estimation of the expected similarity threshold, $\theta$ , in GaussDCA

Two sequences are considered similar if their Hamming distance is below a given threshold. (Baldassi *et al.*, 2014a) introduced an automatic estimation as the average fraction of differences across the alignment, and implemented it by directly counting them, which is  $\mathcal{O}(m^2)$  on the number of sequences in the alignment.

The same result can be obtained in linear time by counting the number of occurrences of each symbol in each column (called the bincount function), and computing the 2-combination  $\binom{n}{2}$ . For an alignment of  $C$  columns and an alphabet of size  $Q$ :

$$n_{matches} = \sum_c^C \sum_q^Q \binom{\#alignment_c = q}{2} \quad (1)$$

## 3 Training

### 3.1 Description of inputs

#### 3.1.1 One-dimensional inputs

From the columns of the multiple sequence alignment we can compute the probability of finding each amino acid or gap,  $p_i$ . For amino acids, we compute the average frequency  $\langle p_i \rangle$  as the observed frequency of the amino acid on the Uniref50 dataset. The expected probability of gap  $\langle p_- \rangle$  is estimated from each alignment. We consider a total of 23 amino acid states, the usual 20, plus the gap state, plus B (asparagine or aspartic acid) and X (unknown).

For each column we can compute self-information as the vector of entries:

$$I_i = \log_2(p_i / \langle p_i \rangle), \quad (2)$$

and the partial entropies are defined as:

$$S_i = p_i \log_2(p_i / \langle p_i \rangle) \quad (3)$$

The sequence is given as one hot encoding.

### 3.1.2 Two-dimensional inputs

The two-dimensional inputs are mutual information (MI), normalized mutual information (NMI), cross entropy (H), and GaussDCA.

Mutual information is defined as:

$$MI(x, y) = \sum_{x,y} p(x, y) \log \left( \frac{p(x, y)}{p(x)p(y)} \right) \quad (4)$$

We also include two more inputs that are adjusted versions of MI. The first is normalized mutual information, where we think of  $MI$  as an analogue of a covariance, and  $NMI$  is the Pearson correlation coefficient. The entropies of the columns play the role of the variances:

$$NMI(x, y) = \frac{MI(x, y)}{\sqrt{S(x)S(y)}} \quad (5)$$

And lastly, cross entropy is calculated as an additive normalization of mutual information:

$$H(x, y) = S(x) + S(y) - MI(x, y) \quad (6)$$

The Average Product Correction (APC) (Dunn *et al.*, 2008) is applied to all two-dimensional inputs except for cross entropy.

## 3.2 Training and testing sets

PconsC4 is trained on a set of 2891 proteins culled from PDB using PISCES (Wang and Dunbrack, Jr., 2003) with a maximum sequence identity 20%, minimum resolution 2.0 Å, maximum R-factor 0.3. Furthermore, chains from the same ECOD (Cheng *et al.*, 2014) H-group as any protein in the benchmark dataset or dating from after 2016-05-01 was removed to avoid potential overlap with the test datasets. Out of these 2891 proteins, 100 randomly selected proteins were used as a validation set for optimization, see Table S3 and S4. For benchmarking, two datasets are used, the same 180 proteins, Table S5 as in (Michel *et al.*, 2017) and the 44 proteins from CASP12 with available structures, Table S6

## 4 Pipeline

We include a schematic of the complete pipeline, see Figure S6.

In the upper left corner are the 1D inputs being fed to the pre-trained model taken from ProQ4 (Menéndez Hurtado *et al.*, 2018). It is pre-trained to predict secondary structure and surface accessibility for each residue (golden outputs in the middle left).

The 128 output channels of the second to last layer are used to extract relevant 1D features. These are then transformed into 2D features by the outer product and combined with the remaining 2D features (GaussDCA, Mutual Information, Normalized Mutual Information, and Cross Entropy). The concatenation is then passed on to the U-net block (lower rectangle).

U-net was developed for image segmentation and combines convolutional layers, max pooling (downwards arrows) to increase the effective receptive field,

upsampling (upwards arrows) to recover the original size, and skip connections (horizontal arrows) to help convergence.

The final predictions are shown on the upper right: contact maps at the three distance thresholds and distance as S-score. The branch predicting S-score is solving a regression problem with a Mean Squared Error loss, whereas the other three output branches are classifying the probability of a contact for the thresholds of 6, 8, or 10 Å, and use a cross entropy loss.

All intermediate convolutional layers are followed by a ELU (Clevert *et al.*, 2015) non linearity, Batch Normalization (Ioffe and Szegedy, 2015), and a Dropout layer (Srivastava *et al.*, 2014) with a probability of 0.1. Weights are initialized using the He distribution as described in the ResNet paper (He *et al.*, 2016). A weight decay of  $10^{-12}$  on the  $L^2$ -norm is applied for regularization. All output layers have an appropriate function to ensure the output is in the valid range, sigmoid in our case.

The model is trained for 100 epochs (full passes over the training data) using the Adam optimizer at an initial learning rate of 0.001. The learning rate is decreased by a factor of 0.5 if the S-score training loss did not decrease over the last five epochs. The training dataset is shuffled after each epoch. The final model was selected by taking the epoch with minimum S-score loss on the validation dataset (epoch 29).

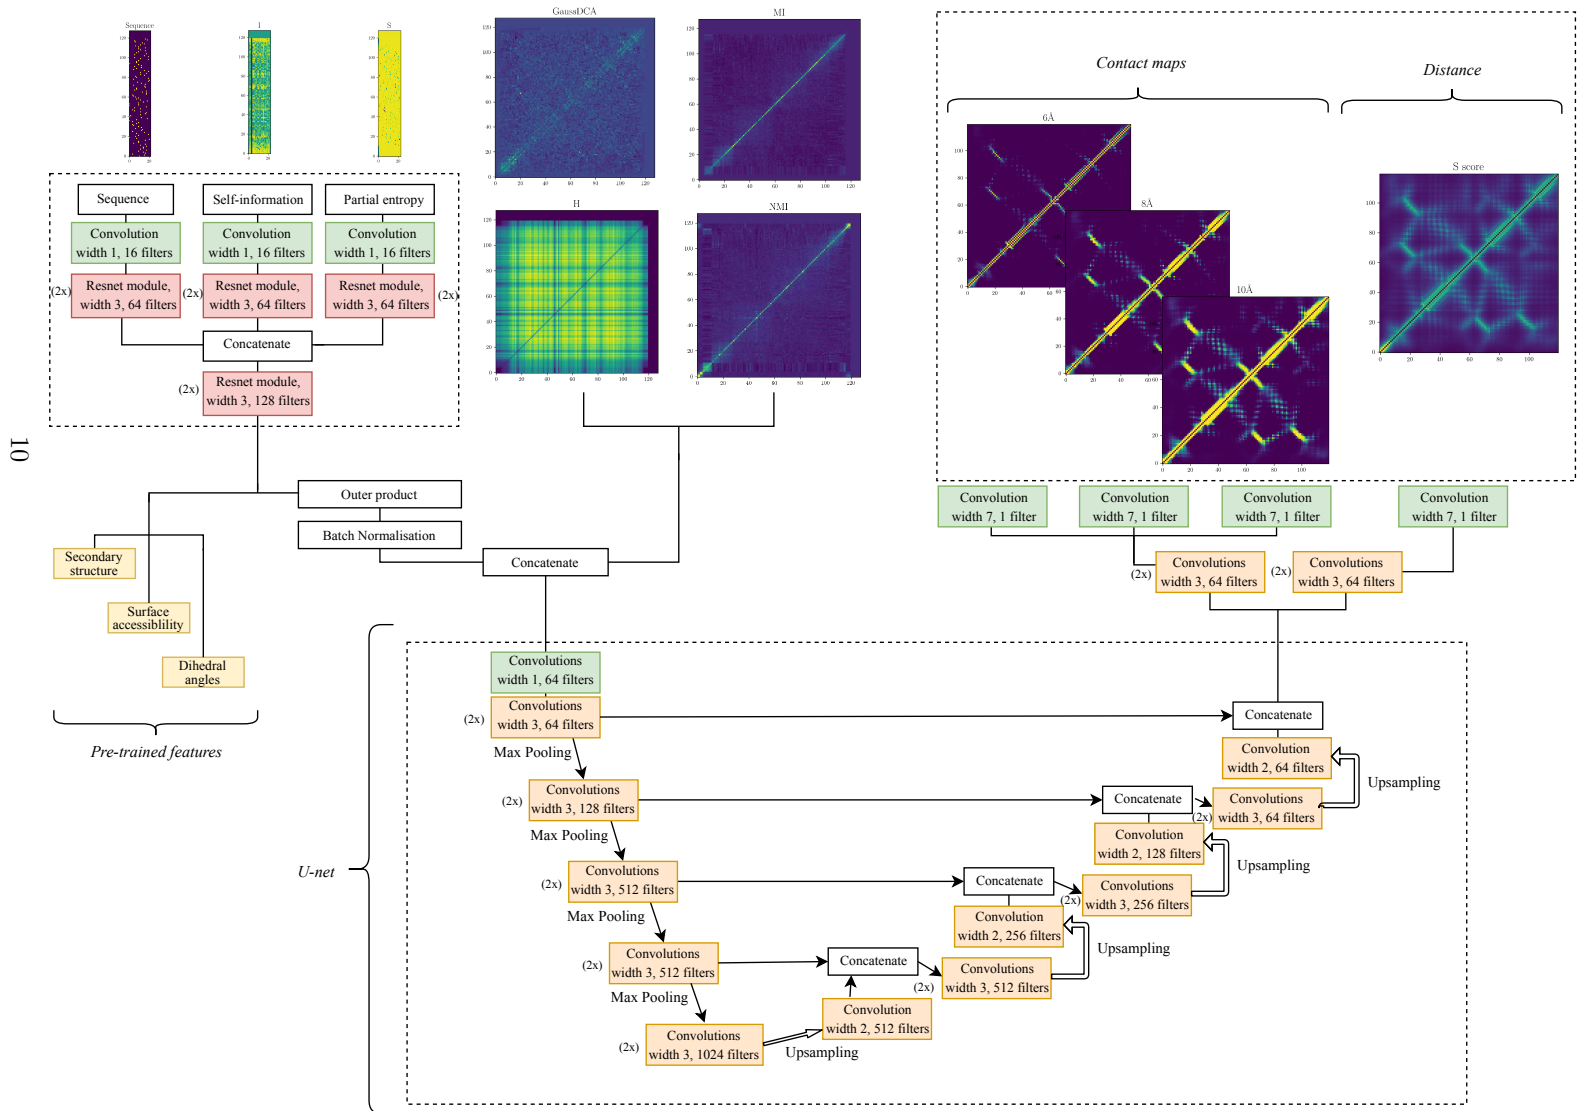

Figure S6: The example is the protein 2AV5 chain D from the benchmark set.

## 5 Instructions

### 5.1 Installation

On a machine with Python 3.5 or higher and pip, PconsC3 can be installed using the following commands:

```
pip install numpy Cython pythran
wget https://github.com/ElofssonLab/PconsC4/releases/download/0.2/\
pconsc4-0.2.tar.gz
pip install pconsc4-0.2.tar.gz
```

Once additional space is granted in PyPI (Python Package Index), a simple `pip install pconsc4` will be sufficient.

A deep learning backend compatible with Keras will also be needed. We recommend Tensorflow:

```
pip3 install -U tensorflow
```

### 5.2 Example usage

```
import pconsc4

# Load the deep learning model
model = pconsc4.get_pconsc4()

# It is possible to re-use on different alignments
pred_1 = pconsc4.predict(model, 'path/to/alignment1')
pred_2 = pconsc4.predict(model, 'path/to/alignment2')

# Show pred_1 on the screen:
import matplotlib.pyplot as plt
plt.imshow(pred_1['contacts']['cmap'])
plt.show()

# Save pred_2 in CASP format:
from pconsc4.utils import format_contacts_casp
print(format_contacts_casp(pred_2['contacts']['cmap'],
                           seq_2, min_sep=5))
```

### 5.3 Supported formats

The program accepts alignments in `.fasta`, `.a3m`, or `.aln`, without line wrapping.

## 6 Training and test sets

PconsC4 is trained on a set of 2891 proteins culled from PDB using PISCES (Wang and Dunbrack, Jr., 2003) on 2017-09-14 with the following criteria: maximum sequence identity 20%, minimum resolution 2.0 Å, maximum R-factor 0.3. Furthermore, chains from the same ECOD (Cheng *et al.*, 2014) H-group as any protein in the benchmark dataset or dating from after 2016-05-01 was removed to avoid potential overlap with the test datasets. Out of these 2891 proteins, 100 randomly selected proteins were used as a validation set for optimization.



Table S3: PDB code and chain identification for proteins in the training set

1A1XA 1A62A 1A73A 1A76A 1AF7A 1AH7A 1ALUA 1AOC A 1AOLA 1AYOA 1B8PA 1BGCA 1BGFA 1BKRA  
1BM9A 1BX4A 1BX7A 1BXYA 1BY1A 1C1KA 1C7KA 1CC8A 1CDWA 1CEOA 1CFBA 1CHDA 1CMCA 1CQYA  
1CUKA 1CV8A 1CXQA 1D0QA 1D2SA 1D2TA 1D4OA 1D9CA 1DCSA 1DD3A 1DD9A 1DG6A 1D7A 1DK8A  
1DM9A 1DMGA 1DS1A 1DUSA 1DVOA 1DXGA 1DY5A 1DZFA 1E58A 1E7LA 1EAQA 1EB6A 1EG2A 1EGWA  
1EJ8A 1ELKA 1EP0A 1EYEA 1EZGA 1EZWA 1F1EA 1F32A 1F39A 1F3VA 1F86A 1F9VA 1PCQA 1FCYA 1FIPA  
1FLMA 1FOBA 1FSFA 1FUKA 1FVIA 1FX2A 1FYEA 1G2RA 1G2YA 1G3PA 1G5TA 1G6XA 1G8EA 1G8QA  
1GAKA 1GMXA 1GNYA 1GPRA 1GS5A 1GS9A 1GSAA 1GV9A 1GVPA 1GWWA 1H2CA 1H4XA 1H8PA 1H8UA  
1H97A 1H99A 1H9MA 1HCZA 1HDOA 1HH8A 1HQ0A 1HQ1A 1HUFA 1HUWA 1HXIA 1HXNA 1HXRA 1HZ6A  
1HZTA 1I1WA 1I2KA 1I2TA 1I4JA 1I71A 1I8AA 1IAPA 1ID0A 1IFGA 1IFRA 1IGQA 1IIBA 1IJVA 1IQZA  
1IRQA 1ISUA 1IZCA 1IZMA 1J0PA 1J1TA 1J2TA 1J33A 1J3AA 1J5PA 1J5UA 1J5XA 1J7XA 1J8A 1J98A  
1JB3A 1JBEA 1JBZA 1JEOA 1JERA 1JF4A 1JG1A 1JHJA 1JHSA 1JI7A 1JIDA 1JL1A 1JM1A 1JN1A 1J00A  
1JOSA 1JOWA 1JR7A 1JX6A 1JYHA 1K3XA 1K4IA 1K5CA 1K77A 1K7CA 1K7JA 1K8WA 1KGD A 1KHXA  
1KMTA 1KNGA 1KNMA 1KOE A 1KP6A 1KPTA 1KQ6A 1KS9A 1KT6A 1KYFA 1KZFA 1L2PA 1L3KA 1L3PA  
1L6FA 1L8JA 1LCOA 1LDDA 1LFFA 1LJ0A 1LKIA 1LKK A 1LMIA 1LNIA 1LS1A 1LTMA 1LUZA 1LWBA 1LXJA  
1LZLA 1M2DA 1M40A 1M4LA 1M65A 1M9ZA 1MAIA 1MC2A 1MIXA 1MJ5A 1MK0A 1MKKA 1MNN A 1MSCA  
1MUNA 1MY7A 1N08A 1N12A 1N1FA 1N8VA 1N9PA 1NARA 1NEPA 1NFPA 1NG6A 1NIGA 1NIIA 1NIJA 1NIJA  
1NJRA 1NKDA 1NKO A 1NKZA 1NMYA 1NNXA 1NRGA 1NRIA 1NU0A 1NWZA 1O22A 1O4WA 1O54A 1O6DA  
1O7IA 1O8XA 1OAAA 1OD3A 1ODMA 1OH0A 1OHLA 1OI7A 1OISA 1OK0A 1OKSA 1OQJA 1OUSA 1OW1A  
1OZZA 1OZ9A 1P0HA 1P3CA 1P90A 1PG6A 1PQHA 1PSRA 1PSWA 1PUJA 1PV5A 1PZ4A 1Q08A 1Q0PA 1Q2HA  
1Q42A 1Q4AA 1Q4CA 1Q4EA 1Q5YA 1Q73A 1Q8CA 1Q8DA 1Q9UA 1QCSA 1QCZA 1QJ8A 1QJPA 1QNR A  
1QR0A 1QSTA 1QV1A 1QW2A 1QWGA 1QZMA 1R0UA 1R29A 1R3DA 1R4XA 1R5LA 1R6DA 1R6JA 1R75A  
1R7JA 1R7YA 1R8A 1RH6A 1RI6A 1RKIA 1RL6A 1RLHA 1RMM A 1RMOA 1RO2A 1ROCA 1RSSA 1RTQA 1RTTA  
1RTTA 1RV9A 1RXIA 1RYLA 1RYQA 1S29A 1S2OA 1S2XA 1S3CA 1S4KA 1S7KA 1S7ZA 1S9UA 1SAUA 1SBXA  
1SD4A 1SDIA 1SEIA 1SENA 1SF9A 1SFFA 1SFFA 1SFUA 1SH8A 1SQHA 1SR8A 1SRAA 1SZ7A 1SZHA 1T07A  
1T3YA 1T4AA 1T6SA 1T8KA 1T92A 1T95A 1T9FA 1T9IA 1TAGA 1TFFA 1TIFA 1TIGA 1TKEA 1TF6A 1TQ5A  
1TQGA 1TS9A 1TT8A 1TU1A 1TUA A 1TXJA 1TXLA 1U07A 1U6TA 1U9LA 1UCDA 1UCHA 1UCRA 1UCSA  
1UDVA 1UFIA 1UFYA 1UI0A 1UJ8A 1UJCA 1UKFA 1UNKA 1UNQA 1UOYA 1US0A 1USGA 1UT7A 1UUYA  
1UV7A 1UX6A 1UXOA 1UZ3A 1UZKA 1V05A 1V0AA 1V2ZA 1V6PA 1V74A 1V77A 1V96A 1V9MA 1VAJA  
1VBA 1VBWA 1VCCA 1VD6A 1VGJA 1VH5A 1VHNA 1VJFA 1VJLA 1VK1A 1VK4A 1VKKA 1VL7A 1VLSA  
1VLYA 1VMB A 1VMGA 1VMHA 1VPSA 1VR7A 1VR8A 1VY1A 1VYKA 1VZMA 1W0HA 1W0NA 1W1GA 1W4SA  
1W5A 1W6WA 1WEHA 1WERA 1WHIA 1WHO A 1WJXA 1WKC A 1WLJA 1WMHA 1WN2A 1WNA A 1WNHA 1WNIA  
1WOUA 1WQGA 1WV3A 1WWCA 1WWIA 1X0TA 1X2IA 1X3KA 1X6IA 1X6OA 1XGZA 1X8QA 1XAU A 1XBIA  
1XCLA 1XDZA 1XE1A 1XJ3A 1XJVA 1XKRA 1XLQA 1XMK A 1XMTA 1XQOA 1XSVA 1XT5A 1XTPA 1XUBA  
1XW3A 1XYIA 1Y08A 1Y5HA 1Y63A 1Y6XA 1Y71A 1Y80A 1Y88A 1Y8AA 1Y9LA 1YB3A 1YD0A 1YDIA 1YFQA  
1YGA 1YGT A 1YI9A 1YJFA 1YLEA 1YLIA 1YLXA 1YN4A 1YOZA 1YQ5A 1YQEA 1YQHA 1YQA 1YRKA 1YRKA  
1YWMA 1YZVA 1Z0NA 1Z0PA 1Z21A 1Z67A 1Z6MA 1Z6NA 1Z9LA 1ZARA 1ZCEA 1ZDOA 1ZDYA 1ZGKA  
1ZHYA 1ZJ8A 1ZK4A 1ZK5A 1ZLDA 1ZM8A 1ZMAA 1ZMIA 1ZO2A 1ZPSA 1ZS9A 1ZT3A 1ZUUA 1ZWX A  
1ZXXA 1ZZKA 2A0BA 2A26A 2A6ZA 2A72A 2AGKA 2AH5A 2AIBA 2AJ6A 2ANXA 2AP3A 2ASBA 2ASKA  
2ATZA 2AWLA 2AWMA 2AXCA 2AXOA 2AXWA 2AYDA 2B0AA 2B18A 2B1YA 2B3PA 2B4WA 2B8IA 2B8MA  
2B97A 2B9DA 2BCQA 2BDRA 2BF5A 2BFWA 2BIOA 2BJFA 2BJNA 2BKAA 2BKFA 2BKMA 2BL8A 2BOPA  
2BTA 2BTIA 2BW0A 2BZ1A 2BZGA 2C2IA 2C3VA 2C60A 2C71A 2CAYA 2CB8A 2CCQA 2CCVA 2CG7A  
2CHHA 2CIUA 2CIWA 2CJJA 2CKKA 2CO3A 2CPGA 2CST A 2CULA 2CVBA 2CVEA 2CW9A 2CWSA 2CXYA  
2CX7A 2CXAA 2CXHA 2CXYA 2CY5A 2CYJA 2CZSA 2D2EA 2D48A 2D4PA 2D4XA 2D59A 2D5MA 2D68A  
2D7VA 2D81A 2DB7A 2DDXA 2DEJA 2DFAA 2DLBA 2DNJA 2DP9A 2DPM A 2DQAA 2DQLA 2DVKA 2DWKA  
2DXAA 2DXQA 2DYIA 2E12A 2E1FA 2E2OA 2E3HA 2E56A 2E5YA 2E6MA 2E6XA 2E7VA 2E85A 2E8EA 2EAQA  
2EBEA 2EBNA 2EFVA 2EH3A 2EH4A 2EJ9A 2EK0A 2EKLA 2ELAA 2ENDA 2ERFA 2ERVA 2ESSA  
2ET1A 2ET1A 2EVRA 2EWOA 2F1FA 2F1NA 2F22A 2F23A 2F46A 2F69A 2F9HA 2FA5A 2FB6A 2FB9A 2FBQA  
2FCWA 2FD4A 2FHTA 2FHZ A 2FIIA 2FJ8A 2FL4A 2FM9A 2FMAA 2FOZA 2FQ4A 2FSJA 2FSQA 2FSRA 2FSUA  
2FUEA 2FUJA 2FUPA 2FVVA 2FVYA 2FWHA 2FWTA 2FYGA 2FZPA 2G0CA 2G1UA 2G3RA 2G40A 2G70A  
2G75A 2GA1A 2GAUA 2GENA 2GJ3A 2GJLA 2GKEA 2GKGA 2GKPA 2GMQA 2GNOA 2GOMA 2GPEA 2GPFA  
2GQTA 2GS5A 2GSVA 2GU3A 2GUDA 2GU1A 2GUKA 2GXQA 2HZQA 2GZSA 2H0UA 2H1VA 2H30A 2H5PA  
2HE6A 2H70A 2H8EA 2H9WA 2HALA 2HBA A 2HC8A 2HE7A 2HHCA 2HHZA 2HINA 2HJEA 2HJNA 2HJOA  
2HKVA 2HL7A 2HL9A 2HLJA 2HLYA 2HNGA 2HP7A 2HQ4A 2HQQA 2HQZA 2HRSA 2HS1A 2HU9A 2HUHA  
2HUIA 2HVA 2HX0A 2HX5A 2HXXA 2HYTA 2HZCA 2I02A 2I2CA 2I53A 2I5HA 2I5UA 2I6DA 2I8DA 2I8TA  
2I9CA 2I9IA 2I9WA 2IA7A 2IAYA 2IC2A 2IC6A 2IDL A 2IGPA 2IH2A 2IHA 2IJA 2IKKA 2ILKA 2ILRA 2IM9A  
2IMFA 2IN3A 2INWA 2IP6A 2IRXA 2IU1A 2IUWA 2IVNA 2IXMA 2IY2A 2IYVA 2IZXA 2J22A 2J6AA  
2J6BA 2J73A 2J8KA 2J97A 2J9WA 2JAYA 2JDCA 2JE3A 2JEKA 2JFRA 2JFUA 2JG6A 2JH1A 2JKUA 2JLIA  
2JMCMA 2NLRA 2NLVA 2NNUA 2NPNA 2NQ3A 2NR7A 2NRR A 2NS0A 2NSAA 2NSFA 2NSZA 2NUHA 2NUJA  
2NVHA 2NWFA 2NWH A 2NX2A 2NXFA 2NZCA 2O0AA 2O0MA 2O1QA 2O24A 2O2XA 2O30A 2O38A 2O4AA  
2O4DA 2O4TA 2O5HA 2O6LA 2O7AA 2O8NA 2O8PA 2O8QA 2O90A 2O95A 2OA2A 2OAF A 2OB5A 2OBLA  
2OCTA 2OD0A 2OD5A 2OEB A 2OEEA 2OF3A 2OFCA 2OFZA 2OHWA 2OIXA 2OJHA 2OKMA 2OKTA 2OKUA  
2OMDA 2OMLA 2OQ3A 2OCCA 2OOKA 2OPCA 2OQBA 2OQZA 2OS0A 2OSOA 2OU3A 2OU5A 2OU6A 2OV0A  
2OVGA 2OVJA 2OVSA 2OXLA 2OXNA 2OXOA 2OY9A 2OYAA 2OYNA 2OYRA 2OZEA 2OZHA 2OZJA 2OZNA  
2OZTA 2P08A 2P17A 2P2VA 2P38A 2P4FA 2P51A 2P58A 2P5DA 2P5KA 2P65A 2P67A 2P6VA 2P84A  
2P9WA 2PA7A 2PAGA 2PC1A 2PEBA 2PETA 2PFIA 2PH0A 2PIEA 2PK8A 2PMAA 2PN1A 2PN2A 2PORA  
2PPVA 2PQ8A 2PR7A 2PRVA 2PRXA 2PSPA 2PU3A 2PV4A 2PVBA 2PWWA 2Q12A 2Q3TA 2Q3VA 2Q4MA  
2Q6KA 2Q82A 2Q8PA 2Q9KA 2Q9RA 2QDJA 2QF4A 2QFEA 2QGUA 2QHQA 2QJLA 2QJZA 2QK1A 2QKVA  
2QL8A 2QLTA 2QMLA 2QMQA 2QNGA 2QNIA 2QNK A 2QNLA 2QRUA 2QSB A 2QSKA 2QSWA 2QT1A 2QTD A  
2QU1A 2QUDA 2QUOA 2QUPA 2QYWA 2QZ0A 2QZQA 2R01A 2R0XA 2R16A 2R2YA 2R31A 2R4GA 2R4QA  
2R9FA 2RA9A 2RBKA 2RCIA 2RDCA 2RDQA 2RE2A 2RFAA 2RFRA 2RGA 2RH2A 2RH3A 2RHFA 2RIQA  
2RJ2A 2RJIA 2RK3A 2RKHA 2RKLA 2RKQA 2SAKA 2TGIA 2U08A 2U0RA 2UV4A 2UY2A 2UYOA 2UZ8A  
2V03A 2V05A 2V1MA 2V1TA 2V33A 2V3GA 2V3SA 2V75A 2V79A 2V7FA 2V7SA 2V89A 2V9BA 2V9VA 2VB1A  
2VCSA 2VDF A 2VDJA 2VEZA 2VGAA 2VH3A 2VHKA 2VJWA 2VK2A 2VLA A 2VMHA 2VOVA 2VPAA 2VPBA  
2VQ2A 2VVWA 2VXGA 2VXNA 2VXZA 2VY8A 2VZCA 2W0GA 2W15A 2W1RA 2W2RA 2W31A 2W39A 2W3GA  
2W3QA 2W47A 2W56A 2W7AA 2W9YA 2WAOA 2WBNA 2WCRA 2WDSA 2WF7A 2WFBA 2WFA 2WFOA  
2WH7A 2WJ5A 2WJRA 2WK1A 2WLIA 2WLT A 2WLV A 2WNFA 2WPF A 2WQFA 2WQA 2WTA 2WTPA  
2WURA 2WVIA 2WWEA 2WY4A 2WZOA 2X2UA 2X3GA 2X3MA 2X46A 2X49A 2X4LA 2X55A 2X5CA 2X5GA  
2X5NA 2X5RA 2X5XA 2X6UA 2X8WA 2X9ZA 2XBG A 2XCBA 2XETA 2XF7A 2XFVA 2XGRA 2XHFA 2XIOA  
2XJ4A 2XJGA 2XM5A 2XODA 2XOMA 2XPWA 2XSEA 2XSKA 2XTPA 2XU3A 2XU8A 2XV5A 2XVYA 2XY4A  
2XZ2A 2XZ7A 2Y0GA 2Y0OA 2Y1BA 2Y2ZA 2Y39A 2Y43A 2Y4XA 2Y5PA 2Y6CA 2Y6XA 2Y78A 2Y8GA 2Y8YA  
2Y9UA 2YGA 2YGOA 2YH9A 2YHCA 2YJMA 2YK4A 2YMYA 2YN0A 2YV4A 2YVQA 2YVTA 2YWJA 2YWMA  
2YXFA 2YYOA 2YZTA 2ZYA 2Z0XA 2Z14A 2Z1CA 2Z2BA 2Z2NA 2Z51A 2Z5BA 2Z5EA 2Z5WA 2Z72A 2Z84A  
2Z8LA 2Z8PA 2Z98A 2ZAYA 2ZCAA 2ZCUA 2ZCWA 2ZFGA 2ZGLA 2ZHJA 2ZOUA 2ZOVA 2ZPMA 2ZQA  
2ZVCA 2ZZJA 3A02A 3A0NA 3A0SA 3A0YA 3A1GA 3A27A 3A2ZA 3A4CA 3A4JA 3A57A 3A9FA 3AFA 3ACHA  
3ADOA 3ADYA 3AE1A 3AGNA 3AJ4A 3AJDA 3AKSA 3B09A 3B1VA 3B33A 3B42A 3B49A 3B4QA 3B6EA 3B79A

Continued on next page



4XPXA 4XT6A 4XTBA 4XU4A 4XUOA 4XUWA 4XVVA 4XXXA 4XY5A 4XZFA 4Y2FA 4Y6WA 4Y7SA 4Y88A  
4Y91A 4Y9WA 4YAAA 4YBGA 4YE7A 4YG0A 4YI8A 4YMYA 4YNHA 4YNXA 4YQDA 4YSIA 4YTKA 4YTLA  
4YTVA 4YU8A 4YUCA 4YWZA 4YX1A 4YZ6A 4Z2NA 4Z3HA 4Z47A 4Z4AA 4Z85A 4Z8WA 4ZAVA 4ZBHA  
4ZC3A 4ZCEA 4ZDSA 4ZF7A 4ZGFA 4ZGMA 4ZHWA 4ZJ9A 4ZJHA 4ZJUA 4ZLDA 4ZMKA 4ZMKA 4ZOTA  
4ZQXA 4ZSIA 4ZV5A 4ZVAA 4ZVCA 4ZVFA 4ZX2A 4ZY7A 4ZY9A 4ZYAA 4ZZ1A 5A0NA 5A1QA 5A3AA 5A3DA  
5A4AA 5A67A 5A6WA 5A8CA 5A99A 5A9AA 5A9TA 5AE0A 5AG8A 5AGIA 5AGRA 5AIGA 5AIMA 5AIZA  
5AJGA 5AJJA 5AMHA 5AMTA 5AOTA 5AOYA 5AOZA 5AQ0A 5AZBA 5AZWA 5AZYA 5B1NA 5B1RA 5B3KA  
5B3PA 5B42A 5B4ZA 5BOIA 5BOWA 5BP9A 5BPXA 5BTYA 5BVL A 5BX1A 5BXGA 5BY4A 5BY5A 5BY8A  
5BYKA 5C12A 5C17A 5C1EA 5C2MA 5C30A 5C5GA 5C5ZA 5C6SA 5CDKA 5CETA 5CHPA 5CKLA 5CL8A  
5CNWA 5COFA 5COTA 5COWA 5CR9A 5CTVA 5CUMA 5CVWA 5CWGA 5CXUA 5CYVA 5D22A 5D2FA 5D3KA  
5D3XA 5D7UA 5D8MA 5D8VA 5DAWA 5DBLA 5DFSA 5DGA 5DHDA 5DJEA 5DJOA 5DLBA 5DLOA 5DM2A  
5DMAA 5DMA 5DMMA 5DOMA 5DP2A 5DPGA 5DPOA 5DRFA 5DTCA 5DTXA 5DXLA 5DZ9A 5DZEA 5E0LA  
5E10A 5E1WA 5E2CA 5E3QA 5E50A 5E5YA 5E6XA 5E9PA 5EC6A 5ECD A 5EDFA 5EDLA 5EH1A 5EIPA 5E1UA  
5EJUA 5EKYA 5EMIA 5EOHA 5EP2A 5EPEA 5EQ0A 5EQVA 5EQZA 5EUBA 5EV5A 5EVFA 5EWOA 5EYNA  
5EYRA 5EYSA 5EZQA 5EZUA 5F18A 5F47A 5F4CA 5F5LA 5F6RA 5F7GA 5F8ZA 5FA8A 5FAFA 5FAZA 5FB2A  
5FBFA 5FCEA 5FD9A 5FDBA 5FENA 5FF3A 5FFHA 5FFSA 5FHVA 5FIDA 5FMTA 5FOTA 5FPZA 5FQIA  
5FS4A 5FSVA 5FU5A 5FUBA 5FZSA 5G2HA 5G38A 5G3QA 5HB7A 5HBD A 5HBPA 5HBQA 5HD9A 5HDWA  
5HE9A 5HGZA 5H18A 5H1A 5HJ9A 5HKQA 5HQHA 5HQTA 5HRPA 5HRR A 5HRSA 5HTLA 5HUSA 5HWAA  
5HWIA 5HWVA 5HXFA 5HYAA 5HZ6A 5HZ8A 5I0YA 5I1SA 5I45A 5I5CA 5I5NA 5I77A 5I8JA 5I9PA 5IA7A  
5IBWA 5ICUA 5IDBA 5IDVA 5IE0A 5IG0A 5IGCA 5IGEA 5IGFA 5IHPA 5IHW A 5I16A 5I18A 5I1FA 5IMAA  
5IMUA 5I09A 5IOCA 5IODA 5IQNA 5IT3A 5ITMA 5IUCA 5IWBA 5IWH A 5IXBA 5IXHA 5J1ZA 5J2OA 5J3QA  
5J4FA 5J4LA 5J4RA 5J5LA 5J8EA 5JA5A 5JBR A 5JDKA 5JE5A 5JEDA 5JEEA 5JELA 5JGJA 5JH8A 5JICA  
5JIGA 5JJ2A 5JJOA 5JJXA 5JLBA 5NULA 7A3HA

Table S4: PDB code and chain identification for proteins in the validation set

1H97A 1J5XA 1N12A 1NFPA 1ODMA 1OZ9A 1QJPA 1SENA 1TQGA 1U6TA 1WLJA 1XYIA 1Z18A 2CAYA  
2HE7A 2HNGA 2HQQA 2I1HA 2NQ3A 2OA2A 2OO3A 2OSOA 2P58A 2P5DA 2PSPA 2RH2A 2RIQA 2W3GA  
2WY4A 2YGOA 2ZSPA 2ZHJA 3A4CA 3D06A 3D1PA 3DT5A 3EJVA 3FILA 3FMYA 3G5TA 3GPIA 3H5JA 3H7IA  
3HRGA 3INO A 3JU3A 3LO8A 3LZWA 3MC3A 3MMHA 3N6YA 3QPAA 3U4VA 3U8VA 3VGPA 3ZRXA 3ZZLA  
4A02A 4A4JA 4BOQA 4CCVA 4ETXA 4EUNA 4F2EA 4HDDA 4I71A 4I95A 4JG2A 4K0NA 4KEXA 4L3UA 4N7CA  
4NDSA 4ONRA 4Q2SA 4Q7OA 4RO3A 4TKBA 4V17A 4V3IA 4WHIA 4WJQA 4WNBA 4XKZA 4XVVA 4XXXA  
4YBGA 4YE7A 4YTLA 4ZX2A 5A9AA 5A9TA 5AE0A 5C17A 5E0LA 5E50A 5FENA 5HGZA 5IOCA 5J2OA

Table S5: PDB code and chain identification for proteins in the benchmark set

1AHS C 1C2YD 1C9YA 1CCTA 1COZA 1DBRA 1DCHF 1EDIA 1EFDN 1F46B 1F68A 1FHIA 1FJRB 1FSOG 1G61A  
1GJJA 1GLGA 1GPSA 1H68A 1I95E 1I97T 1IMBB 1IMXA 1IR1S 1IS9A 1JGPR 1JH0L 1K6LH 1KNVB 1KNYB  
1KQPA 1LDIA 1LQKB 1M12A 1MB6A 1MFRP 1MR7A 1N2ZB 1N5BA 1N60C 1NQLB 1OAGA 1OTFF 1P3HE  
1PCFA 1PDFE 1PS1A 1RD9D 1RH7C 1RL9A 1S3FB 1S68A 1SUDA 1SWXA 1SYHA 1TD4A 1TFKB 1TJLD  
1UWZB 1VJNA 1VQZA 1W8AA 1W9GB 1WD5A 1WIGA 1WPVB 1X0PJ 1X48A 1X8HA 1X91A 1XBAA  
1XQFA 1XS6A 1Y4HD 1Y60C 1YG6F 1YHQO 1YQFF 1YWSA 1Z7ME 1ZD7B 1ZJ0A 1ZWYC 2A84A 2A9KB  
2AMCA 2AV5D 2B9NX 2BWEL 2C2OA 2CB6A 2CCCA 2CDMC 2CJRB 2CSMA 2D0PB 2D2CN 2DI0C 2E2AB  
2EJNA 2FORA 2FEEB 2FJCO 2GVIA 2H44A 2HGHA 2HI7B 2HJJA 2HL0A 2I9LI 2IA9E 2I9B 2J1KQ 2J3WA  
2J8WB 2JOVA 2JYNA 2KYSA 2KZSA 2M0MB 2NQ2A 2NR9A 2OF5H 2OGFD 2OHCA 2OJ5C 2ONKC 2OPIA  
2PAVP 2PLSF 2Q7RA 2QQDE 2QYFD 2RDOL 2RMRA 2RTBB 2VGRA 2VT8A 2WNKA 2WNYA 2XVTF 2Y9PB  
2YADB 2YZOA 2ZITD 3A1JB 3ANZW 3AXGI 3B2UB 3B71B 3B7AA 3BLAB 3BP9B 3CPWT 3CVZC 3CXJC  
3D2QD 3DBYF 3DKXB 3EB6B 3EW1A 3G74B 3GUVA 3GYVA 3GZFC 3H8DB 3H90A 3HPGL 3HTYJ 3I9OB  
3IQZF 3K43B 3K8RB 3KZLA 3LW5L 3M71A 3MEZA 3N1GA 3NJA 3O7JA 3OPEB 3OQIA 3P45J 3PC7B 3PJZA  
3QE7A 3QNQA 3RBYB 3T3TB 3UD2B 3UWSA 3UYUB 3V3LB 3VHHB 3VX6A 3ZNUG 3ZUXA 4A5ZB 4AI3A  
4ARB 4AU0B 4DLHB 4E1YB 4E6FA 4F0DA 4HBRC 4I0SH 4IZJC 4J32B

Table S6: PDB code and chain identification for CASP12 targets

T0859 T0860 T0861 T0862 T0863 T0864 T0865 T0866 T0868 T0869 T0870 T0872 T0877 T0878 T0879 T0880  
T0882 T0883 T0884 T0885 T0886 T0889 T0891 T0892 T0893 T0894 T0895 T0900 T0902 T0903 T0904 T0907  
T0909 T0912 T0917 T0918 T0920 T0921 T0922 T0928 T0929 T0930 T0932 T0933 T0942 T0943 T0944 T0945  
T0948

## References

- Baldassi, C., Zamparo, M., Feinauer, C., Procaccini, A., Zecchina, R., Weigt, M., and Pagnani, A. (2014a). Fast and accurate multivariate gaussian modeling of protein families: Predicting residue contacts and protein-interaction partners. *PLoS ONE*, **9**(3), 1–12.
- Baldassi, C., Pagnani, A., Weigt, M., Feinauer, C., Procaccini, A., Zecchina, R., and Zamparo, M. (2014b). Gaussdca.jl - first release.
- Cheng, H., Schaeffer, R., Liao, Y., Kinch, L., Pei, J., Shi, S., Kim, B., and Grishin, N. (2014). ECOD: an evolutionary classification of protein domains. *PLoS Comput Biol*, **10**(12), e1003926.
- Clevert, D., Unterthiner, T., and Hochreiter, S. (2015). Fast and accurate deep network learning by exponential linear units (ELUs). *CoRR*.
- Dunn, S., Wahl, L., and Gloor, G. (2008). Mutual information without the influence of phylogeny or entropy dramatically improves residue contact prediction. *Bioinformatics*, **24**(3), 333–340.
- He, K., Zhang, X., Ren, S., and Sun, J. (2016). Deep residual learning for image recognition. *2016 IEEE Conference on Computer Vision and Pattern Recognition (CVPR)*.
- Ioffe, S. and Szegedy, C. (2015). Batch normalization: Accelerating deep network training by reducing internal covariate shift. *CoRR*, **abs/1502.03167**.
- Menéndez Hurtado, D., Uziela, K., and Elofsson, A. (2018). Deep transfer learning in the assessment of the quality of protein models. *ArXiv e-prints*.
- Michel, M., Skwark, M. J., Menendez Hurtado, D., Ekeberg, M., and Elofsson, A. (2017). Predicting accurate contacts in thousands of pfam domain families using pconsc3. *Bioinformatics*, **33**(18), 2859–2866.
- Srivastava, N., Hinton, G. E., Krizhevsky, A., Sutskever, I., and Salakhutdinov, R. (2014). Dropout: a simple way to prevent neural networks from overfitting. *Journal of Machine Learning Research*, **15**(1), 1929–1958.
- Wang, G. and Dunbrack, Jr., R. L. (2003). PISCES: a protein sequence culling server. *Bioinformatics*, **19**(12), 1589–1591.
